# Supplementary material
Source: Springer Nature journal article supplement (https://www.springermedizin.de/resource/supplementary/12936_2010_1388_MOESM5_ESM.pdf/9549678)

(a)

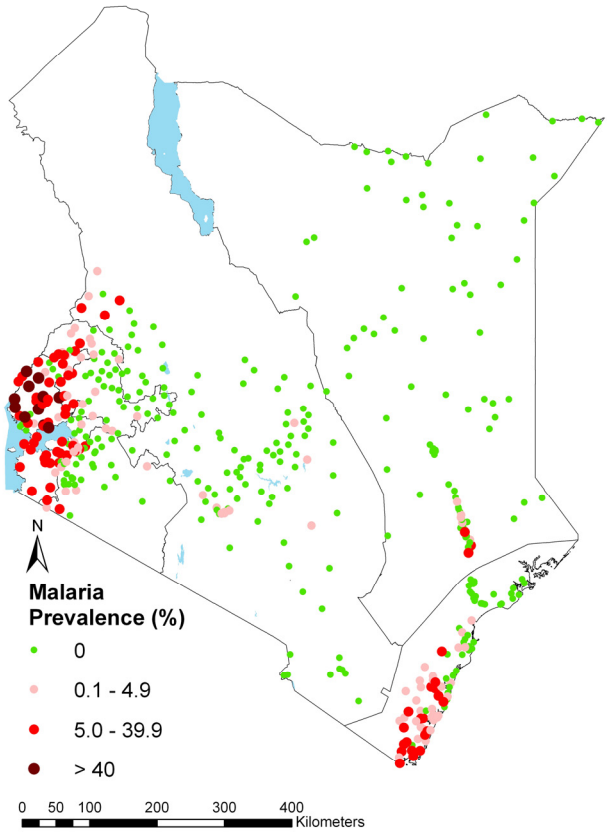

(b)

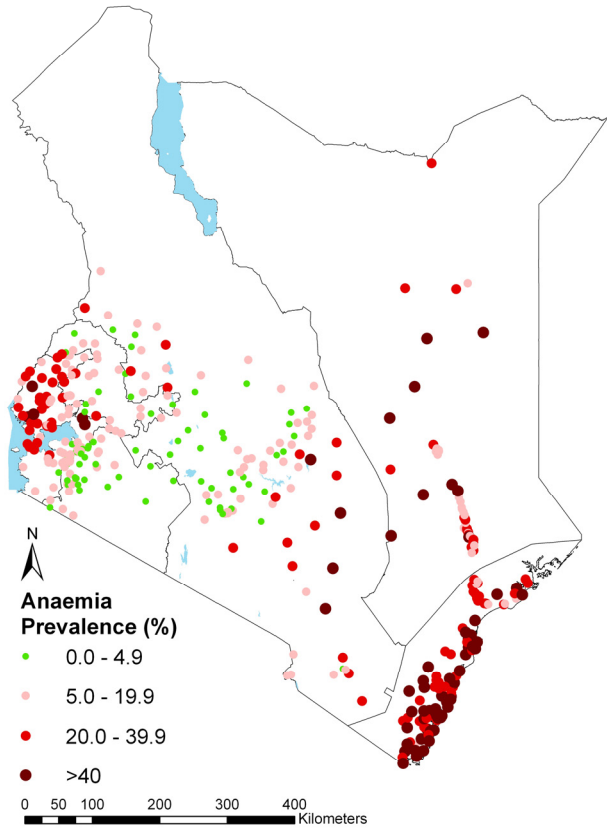

(c)

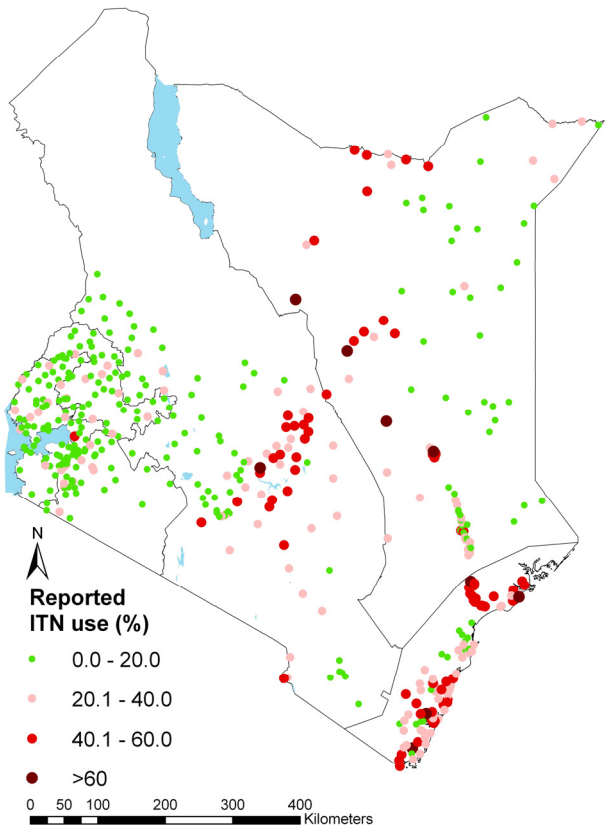

Supplement: MOESM5 [file 9549678]
